# Supplementary material for: Optical properties of orthorhombic germanium selenide: an anisotropic layered semiconductor promising for optoelectronic applications
Source: Royal Society of Chemistry journal article supplement (doi:10.1039/d1tc04280g), 2021-01-01
Supplement: d1tc04280g1.pdf [file d1tc04280g1.pdf]

## Supporting Information

### **Optical properties of orthorhombic germanium selenide: an anisotropic layered semiconductor promising for optoelectronic applications**

*Agata Tolloczko<sup>\*a</sup>, Szymon J. Zelewski<sup>a</sup>, Michał Błaszczak<sup>a</sup>, Tomasz Woźniak<sup>a</sup>,  
Anna Siudzińska<sup>b</sup>, Alicja Bachmatiuk<sup>b</sup>, Paweł Scharoch<sup>a</sup>, Robert Kudrawiec<sup>ab</sup>*

<sup>1</sup> Department of Semiconductor Materials Engineering,  
Wrocław University of Science and Technology,  
Wybrzeże Wyspiańskiego 27, 50-370 Wrocław, Poland

<sup>2</sup> Łukasiewicz Research Network – PORT Polish Center for Technology Development,  
Stabłowicka 147, Wrocław, Poland

\*Corresponding author.

E-mail address: [agata.tolloczko@pwr.edu.pl](mailto:agata.tolloczko@pwr.edu.pl)

**Table S1.** Experimental and reference<sup>a)</sup> energies of the EELS edges observed in the acquired spectra.

| EELS edge | Energy (eV) |           |            |           |
|-----------|-------------|-----------|------------|-----------|
|           | Ge          |           | Se         |           |
|           | Experiment  | Reference | Experiment | Reference |
| $L_1$     | 1413        | 1414      | 1655       | 1654      |
| $L_2$     | 1255        | 1248      | 1479       | 1476      |
| $L_3$     | 1221        | 1217      | 1436       | 1436      |

a) EELS Atlas, <https://eels.info/atlas>

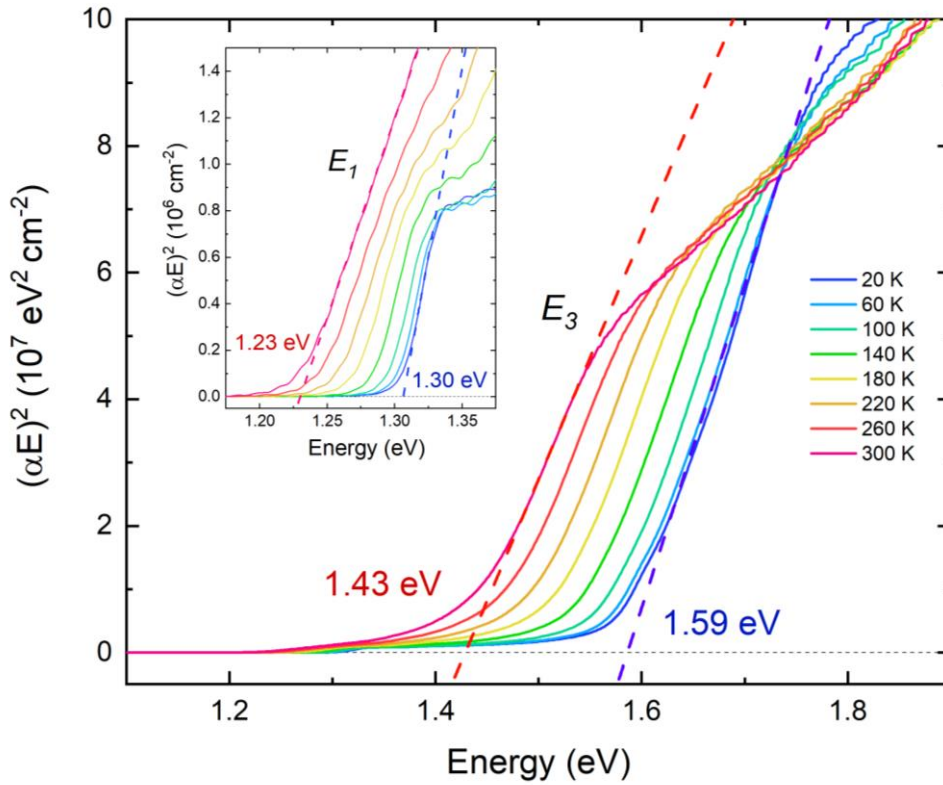

**Fig. S1.** Temperature dependence and linear approximation of Tauc plot of GeSe optical absorption, assuming allowed direct character of the observed absorption edge, corresponding to transition  $E_3$ . The inset shows the weaker absorption edge at the energy of 1.30 eV (at 20 K), corresponding to transition  $E_1$ .

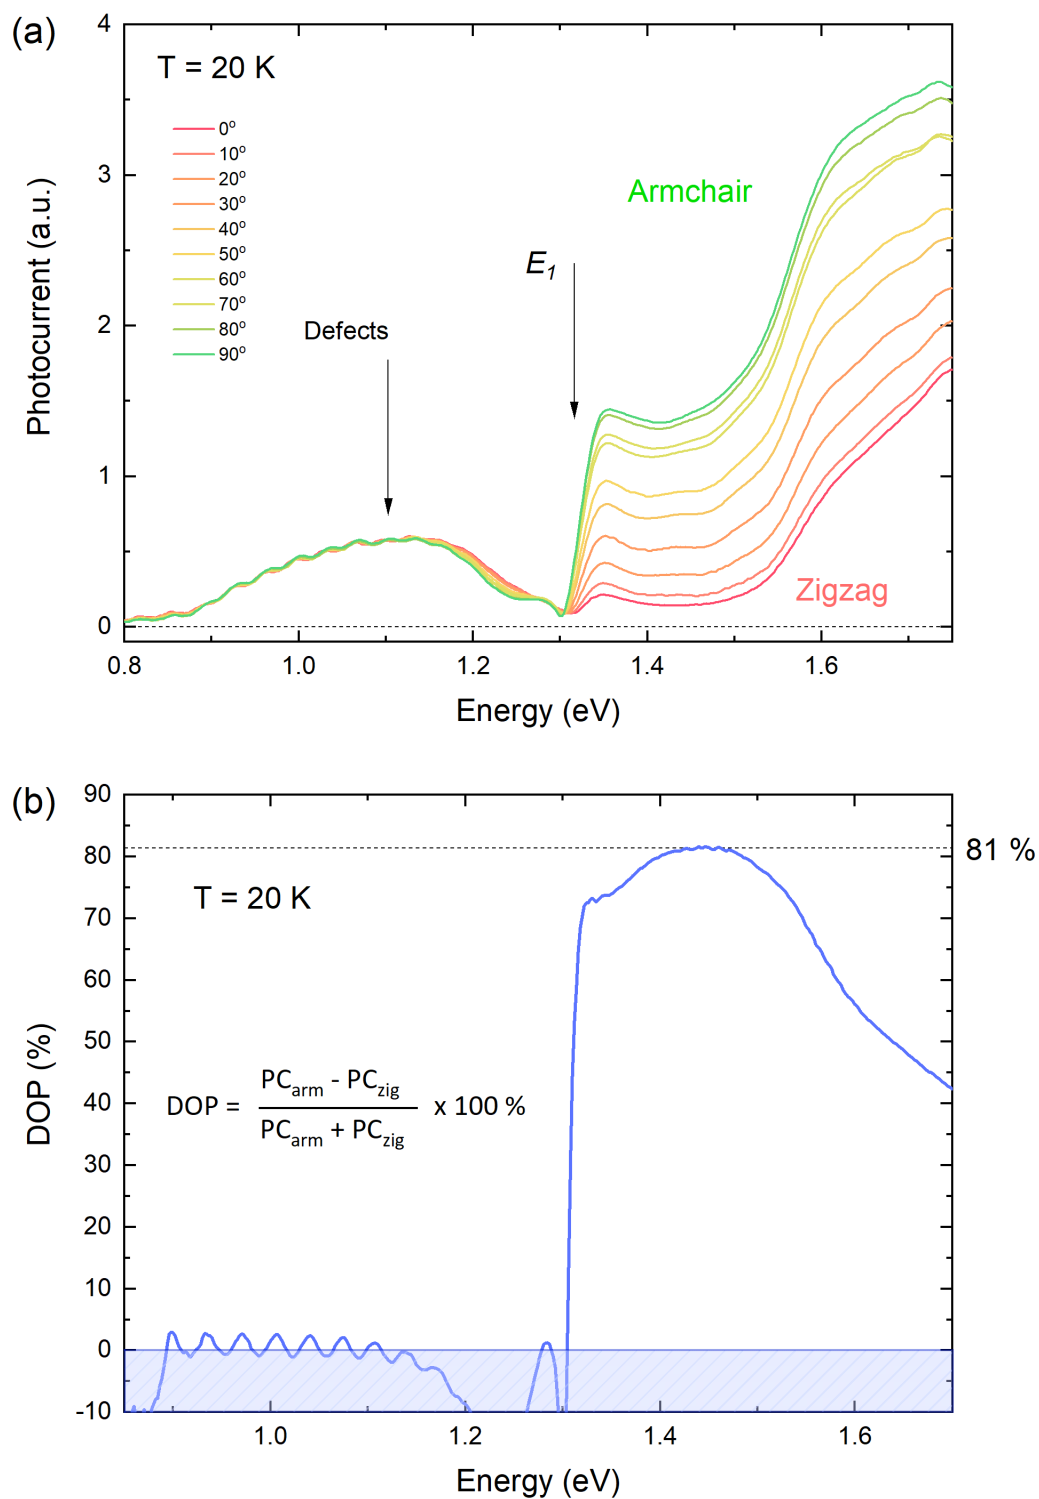

**Fig. S2.** (a) Polarization dependence of the photocurrent, measured at the temperature of 20 K, in zero-bias conditions and (b) the photocurrent degree of polarization (DOP), calculated using the equation from the figure.

**Table S2.** Transition energies from experiment and calculations with mBJ-TB09 and HSE06.

| Transition | Energy (eV) |          |       |
|------------|-------------|----------|-------|
|            | Exp         | mBJ-TB09 | HSE06 |
| $E_0$      | –           | 0.99     | 1.18  |
| $E_1$      | 1.29        | 1.29     | 1.38  |
| $E_2$      | 1.52        | 1.78     | 2.07  |
| $E_3$      | 1.58        | 1.68     | 1.88  |
